# Supplementary material for: Pilot Study of Aerosolised Plus Intravenous Vancomycin in Mechanically Ventilated Patients with Methicillin-Resistant Staphylococcus Aureus Pneumonia
Source: MDPI journal article supplement (doi:10.3390/jcm9020476), 2020-02-09
Supplement: s1 [file s1]

**Table S1.** Inclusion and exclusion criteria.

| Inclusion                                      | Exclusion                                               |
|------------------------------------------------|---------------------------------------------------------|
| Age > 19 years                                 | Non-bacterial pneumonia                                 |
| Mechanical ventilation ( $\geq 48$ hours)      | Underlying respiratory condition <sup>c</sup>           |
| Treating intravenous vancomycin                | Bronchiectasis                                          |
| Nosocomial MRSA pneumonia <sup>a</sup>         | Previous pulmonary tuberculosis                         |
| Healthcare-associated pneumonia                | Chronic obstructive pulmonary disease                   |
| Hospital-acquired pneumonia                    | Asthma                                                  |
| Ventilator-associated pneumonia                | Pleural effusion required drainage                      |
| Community acquired MRSA pneumonia <sup>b</sup> | Active primary or metastatic lung cancer                |
|                                                | Severe congestive heart failure <sup>d</sup>            |
|                                                | Decompensated liver cirrhosis                           |
|                                                | Treating intravenous vancomycin rather than pneumonia   |
|                                                | History of adverse effects to inhaled salbutamol        |
|                                                | Hypersensitivity to vancomycin                          |
|                                                | Microbiologic evidence of <i>Enterococcus</i>           |
|                                                | Pregnancy or breast feeding                             |
|                                                | Immunocompromised <sup>e</sup>                          |
|                                                | Aggressive medical condition <sup>f</sup>               |
|                                                | Severe acute respiratory distress syndrome <sup>g</sup> |
|                                                | Vancomycin MIC $\geq 2$ mcg/mL                          |
|                                                | Other inhaled antibiotics within 48 hours               |
|                                                | Unable to adhere to ventilator protocol                 |
|                                                | Unable to perform arterial catheterisation              |

MRSA, methicillin-resistant *Staphylococcus aureus*; MIC, minimum inhibitory concentration.

<sup>a</sup>Definition and classification of nosocomial pneumonia were based on 2005 ATS/IDSA guidelines with MRSA in bronchoalveolar lavage (for the most infiltrative lesion on chest X-ray) fluid  $>10^4$  CFU/mL; 'healthcare-associated' means those with pneumonia who had any of the following risk factors: residence in a nursing home or extended care facility; 'hospital-acquired' means pneumonia not incubating at the time of hospital admission and occurring  $\geq 48$  hours after admission; and 'ventilator-associated' means that pneumonia occurring  $\geq 48$  hours after endotracheal intubation

<sup>b</sup>Similar to nosocomial cases, only admitted via emergency room from community (not including healthcare-associated facilities) <sup>c</sup>Confirmation required by computed tomography, spirometry, and/or provocation test; <sup>d</sup>Left ventricular ejection fraction  $<30\%$  in echocardiography, <sup>e</sup>Systemic corticosteroid ( $\geq 1$  mg/kg) over 3 months, organ transplantation recipient, acquired immune deficiency syndrome, <sup>f</sup>Expected poor prognosis (e.g., Acute Physiologic And Chronic Health Evaluation (APACHE) II score  $>35$ ), <sup>g</sup>PaO<sub>2</sub>/FiO<sub>2</sub>  $<100$  mmHg.

**Table S2.** Protocol for aerosolised vancomycin treatment.

|                                            |                                                                                                                                                                                                                                              |
|--------------------------------------------|----------------------------------------------------------------------------------------------------------------------------------------------------------------------------------------------------------------------------------------------|
| Drug                                       | Vancomycin HCl 500 mg mixed with isotonic saline 10 mL                                                                                                                                                                                       |
| Nebulising device                          | Vibrating mesh plate                                                                                                                                                                                                                         |
| Frequency                                  | 250 mg/5 mL nebulising for 30 minutes every 12 hours                                                                                                                                                                                         |
| Duration                                   | 5 days                                                                                                                                                                                                                                       |
| Premedication                              | Salbutamol 2.5 mg inhalation for 15 minutes                                                                                                                                                                                                  |
| Mechanical ventilator setting <sup>a</sup> | Constant inspiratory flow<br>Tidal volume 6-8 mL/kg (predicted body weight)<br>I:E ratio 1:1.5-1:2.5<br>Plateau pressure $< 30$ cm H <sub>2</sub> O<br>Remove any humidification system and optimise alveolar recruitment<br>Proper sedation |

<sup>a</sup>Humidification decreases the amount of drug delivered to the patient secondary to water in the air causing the droplets to clump together and more readily attach to the wall of the tube.

**Table S3.** Comparison of major outcomes between matching adjusted enrolled and excluded group<sup>a</sup>.

| Outcomes                                          | Enrolled<br>(n=17) | Excluded<br>(n=17) | P     |
|---------------------------------------------------|--------------------|--------------------|-------|
| Age, median (range)                               | 75.5 (47-87)       | 78 (64-87)         | 0.547 |
| Sex, male                                         | 11 (64.7)          | 15 (88.2)          | 0.112 |
| Acute physiology and chronic health evaluation II | 23.1 ± 6.9         | 23.3 ± 6.9         | 0.921 |
| Clinical response                                 |                    |                    | 0.167 |
| Cure                                              | 4 (23.5)           | 0 (5.9)            |       |
| Improvement                                       | 7 (41.2)           | 8 (47.1)           |       |
| Failure                                           | 3 (17.6)           | 6 (35.3)           |       |
| Indeterminate                                     | 3 (17.6)           | 3 (17.6)           |       |
| Microbiological response                          |                    |                    | 0.500 |
| Eradicated                                        | 12 (70.6)          | 11 (64.7)          |       |
| Persistent                                        | 5 (29.4)           | 6 (35.3)           |       |
| Relapse                                           | 0 (0.0)            | 0 (0.0)            |       |
| Superinfection                                    | 0 (0.0)            | 0 (0.0)            |       |
| Indeterminate                                     | 0 (0.0)            | 0 (0.0)            |       |
| Success of treatment                              | 11 (64.7)          | 8 (47.1)           | 0.245 |
| Duration of intravenous vancomycin                | 15.5 ± 5.9         | 13.1 ± 5.1         | 0.224 |
| Mortality                                         |                    |                    |       |
| In-intensive care unit                            | 5 (29.4)           | 6 (35.3)           | 0.500 |
| In-hospital                                       | 6 (35.3)           | 7 (41.2)           | 0.500 |

Data are presented as n (%) or mean ± standard deviation, <sup>a</sup>Acute physiology and chronic health evaluation II score and age were matched.

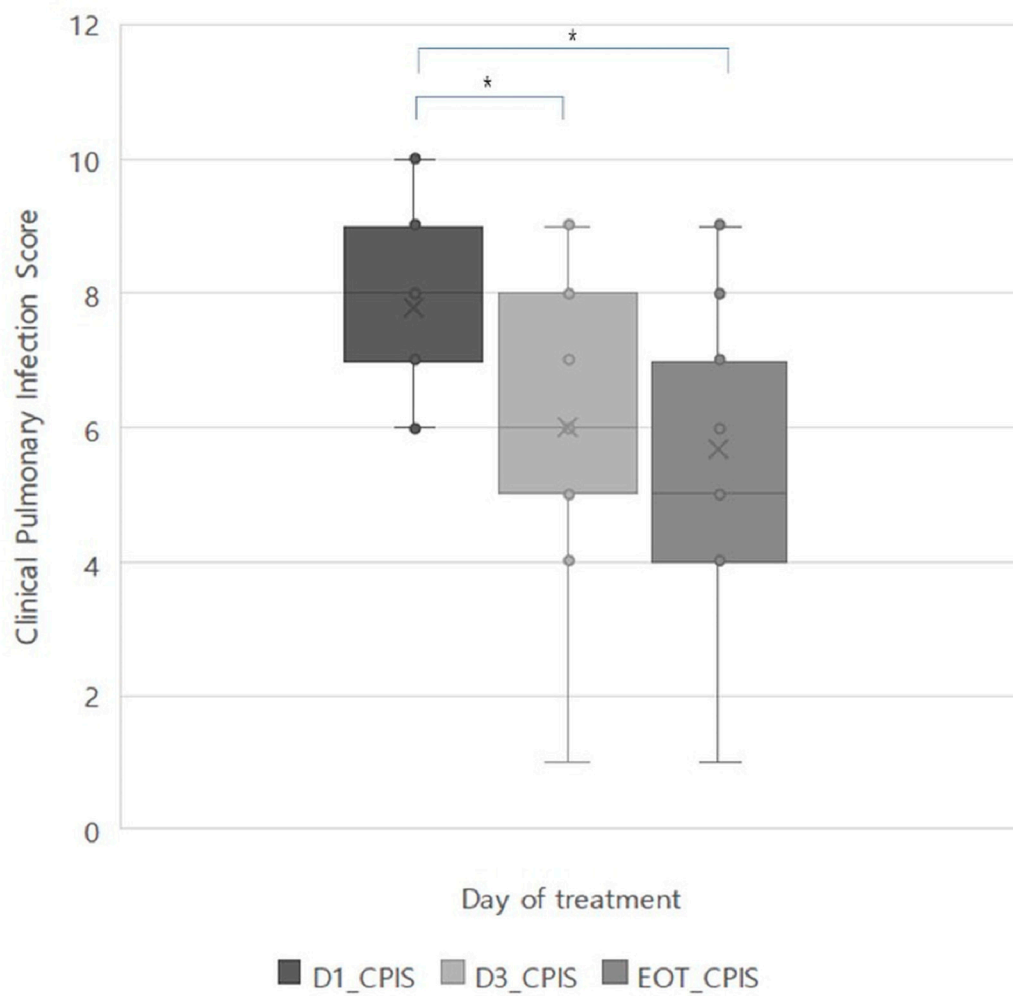

**Figure S1.** Change in clinical pulmonary infection score.
